# Supplementary material for: Biology of Two-Spotted Spider Mite (Tetranychus urticae): Ultrastructure, Photosynthesis, Guanine Transcriptomics, Carotenoids and Chlorophylls Metabolism, and Decoyinine as a Potential Acaricide
Source: MDPI journal article supplement (doi:10.3390/ijms24021715), 2023-01-15

**Supplementary Figure S1:** UV-VIS spectra of the chlorophyll and pheophytin in healthy Lima bean leaves, TSSM-fed Lima bean leaves, and TSSM via HPLC-DAD ( $\lambda$ : 665 nm). Numbers refer to: Chlorophyll b (1); Chlorophyll b' (2); Chlorophyll a (3); Chlorophyll a' (4); Pheophytin b' (5); Pheophytin b (6); Pheophytin a' (7); Pheophytin a (8).

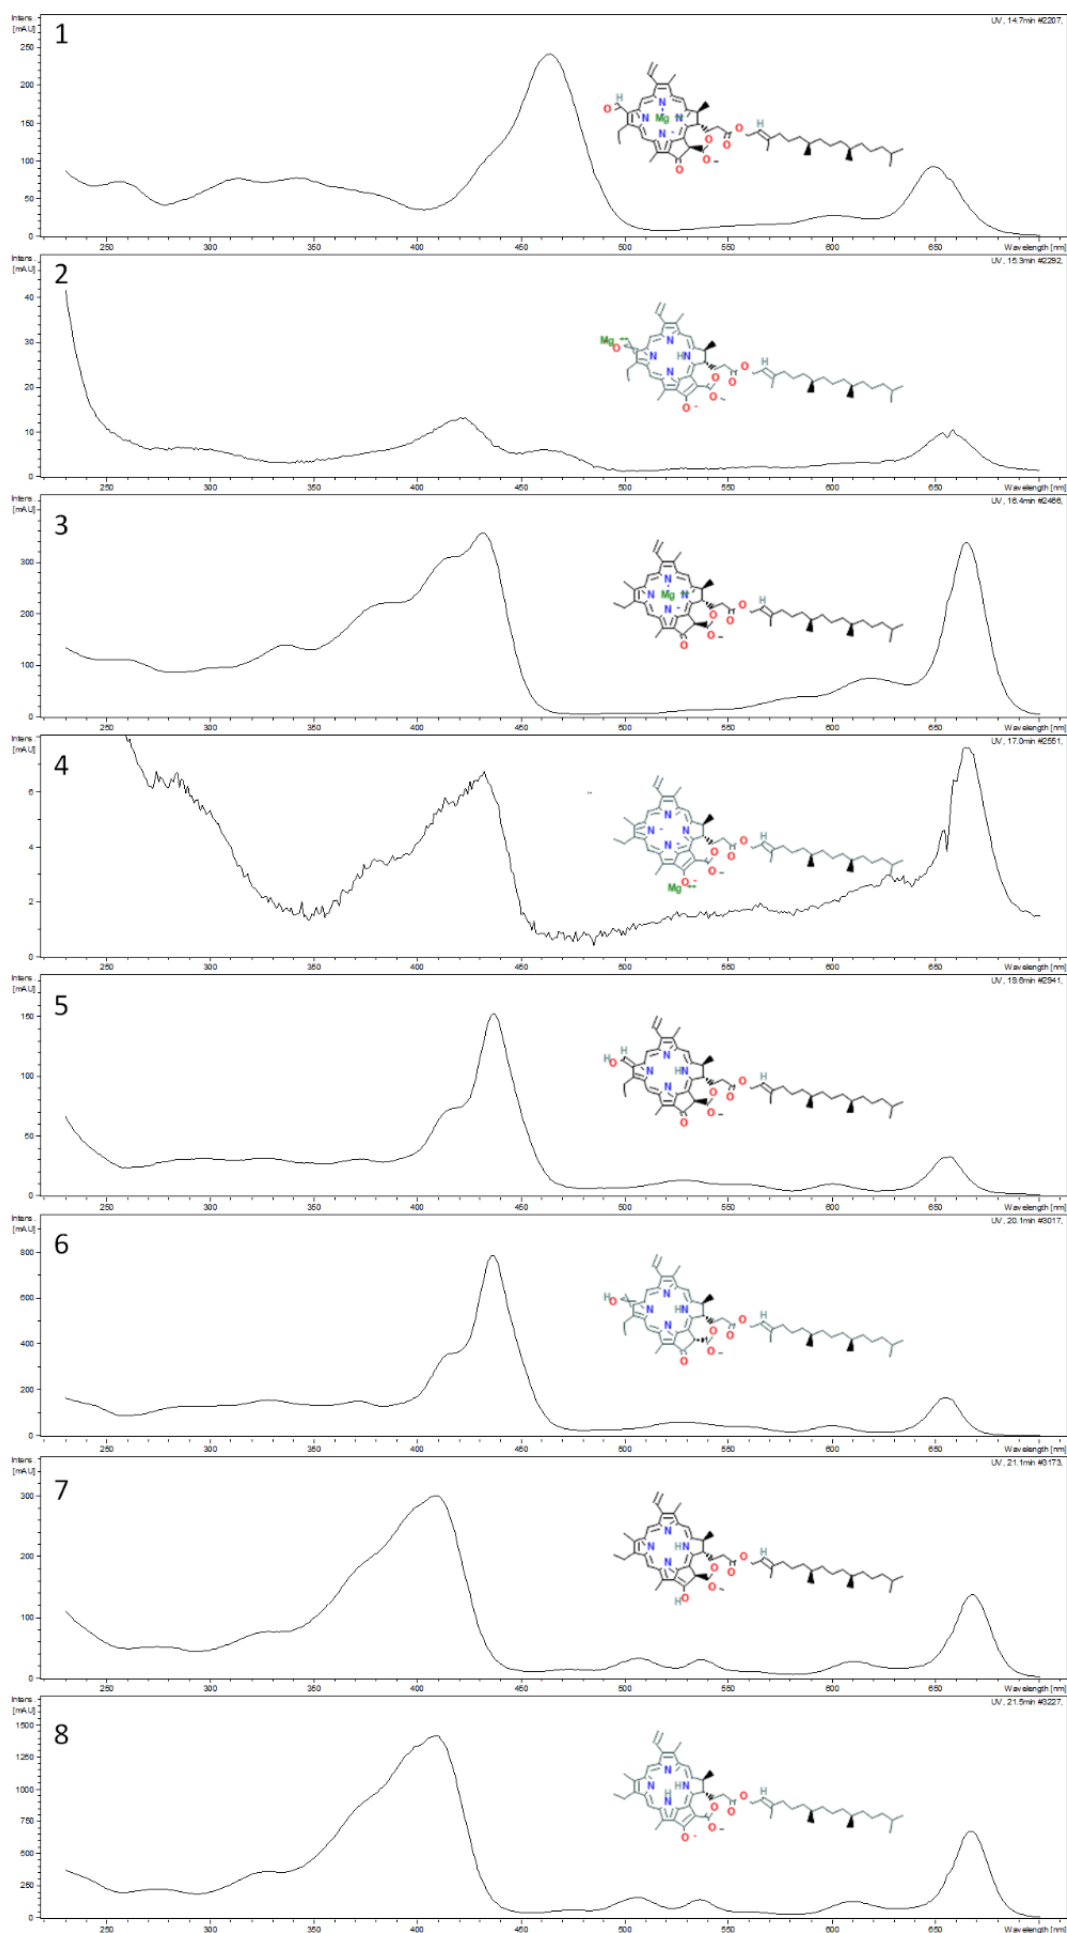

Supplement: s1 [file s1]
