# Supplementary material for: Biology of Two-Spotted Spider Mite (Tetranychus urticae): Ultrastructure, Photosynthesis, Guanine Transcriptomics, Carotenoids and Chlorophylls Metabolism, and Decoyinine as a Potential Acaricide
Source: MDPI journal article supplement (doi:10.3390/ijms24021715), 2023-01-15
Supplement: s1 [file s1]

**Supplementary Table S1:** Tukey's HSD post hoc differences in the content of chlorophyll and chlorophyll degradation products. \*P<0.05; \*\*P<0.01; \*\*\*P<0.001

| Sample(s)      |               | hsd post hoc  |            |
|----------------|---------------|---------------|------------|
| chlorophyll a  | Healthy Leaf  | TSSM-fed leaf | 14.859***  |
|                |               | TSSMs         | 75.889***  |
|                | TSSM-fed leaf | TSSMs         | 61.03***   |
| chlorophyll a' | Healthy Leaf  | TSSM-fed leaf | 5.396***   |
|                |               | TSSMs         | 13.222***  |
|                | TSSM-fed leaf | TSSMs         | 7.826***   |
| pheophytin a   | Healthy Leaf  | TSSM-fed leaf | -0.141*    |
|                |               | TSSMs         | -3.58***   |
|                | TSSM-fed leaf | TSSMs         | -3.439***  |
| pheophytin a'  | Healthy Leaf  | TSSM-fed leaf | -0.896     |
|                |               | TSSMs         | -38.331*** |
|                | TSSM-fed leaf | TSSMs         | -37.435*** |
| chlorophyll b  | Healthy Leaf  | TSSM-fed leaf | 5.28***    |
|                |               | TSSMs         | 19.683***  |
|                | TSSM-fed leaf | TSSMs         | 14.403***  |
| chlorophyll b' | Healthy Leaf  | TSSM-fed leaf | 0.637***   |
|                |               | TSSMs         | 0.676***   |
|                | TSSM-fed leaf | TSSMs         | 0.039      |
| pheophytin b   | Healthy Leaf  | TSSM-fed leaf | n.d.       |
|                |               | TSSMs         | n.d.       |
|                | TSSM-fed leaf | TSSMs         | -0.353***  |
| pheophytin b'  | Healthy Leaf  | TSSM-fed leaf | n.a.       |
|                |               | TSSMs         | n.a.       |
|                | TSSM-fed leaf | TSSMs         | -4.599***  |
| TChC           | Healthy Leaf  | TSSM-fed leaf | 23.478***  |
|                |               | TSSMs         | 60.54***   |
|                | TSSM-fed leaf | TSSMs         | 37.062***  |

n.a. "not applicable" due to lack of the compound in the sample
