# Supplementary material for: Biology of Two-Spotted Spider Mite (Tetranychus urticae): Ultrastructure, Photosynthesis, Guanine Transcriptomics, Carotenoids and Chlorophylls Metabolism, and Decoyinine as a Potential Acaricide
Source: MDPI journal article supplement (doi:10.3390/ijms24021715), 2023-01-15

**Supplementary Figure S2:** UV-VIS spectra of the identified carotenoids in healthy Lima bean leaves, TSSM-fed Lima bean leaves, and TSSM via HPLC-DAD ( $\lambda$ : 450 nm). Numbers refer to: Lutein (1); unidentified carotenoid#1 (2); 15-cis- $\beta$ -carotene (3); 13-cis- $\beta$ -carotene (4); trans- $\alpha$ -carotene (5); trans- $\beta$ -carotene (6); cis- $\alpha$ -carotene (7); 9-cis- $\beta$ -carotene (8);  $\gamma$ -carotene (9).

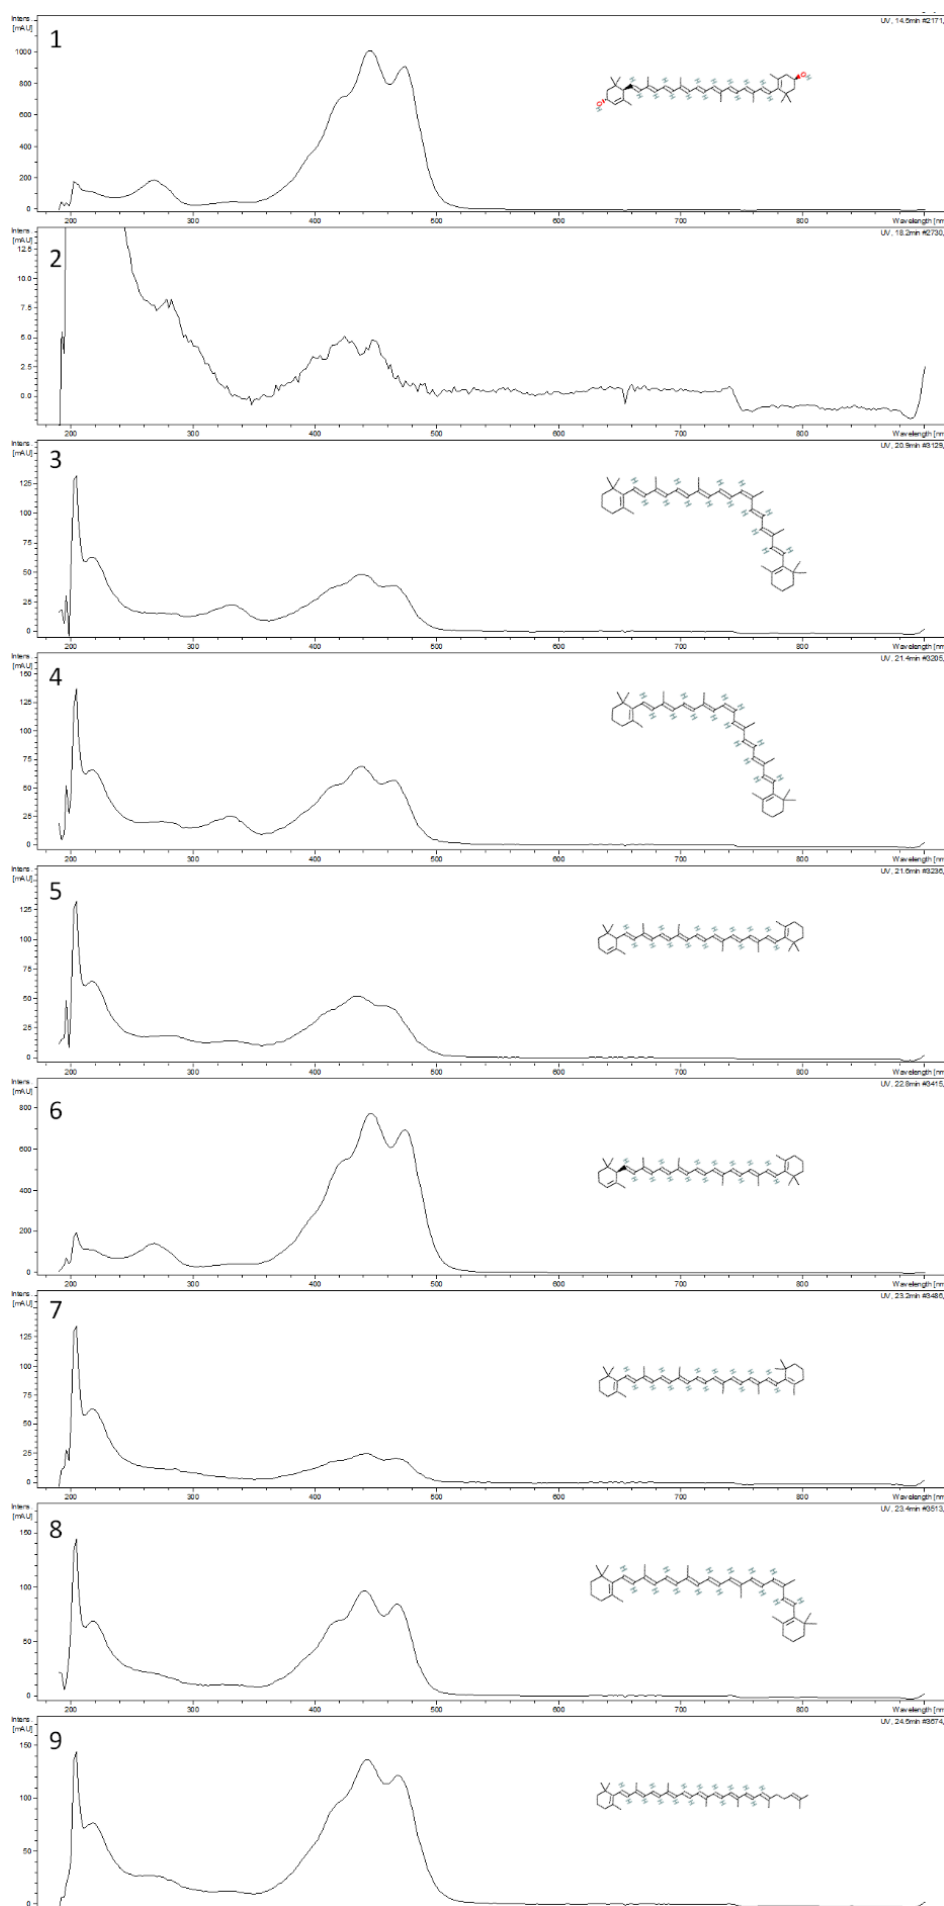

Supplement: s1 [file s1]
