# Supplementary material for: Biology of Two-Spotted Spider Mite (Tetranychus urticae): Ultrastructure, Photosynthesis, Guanine Transcriptomics, Carotenoids and Chlorophylls Metabolism, and Decoyinine as a Potential Acaricide
Source: MDPI journal article supplement (doi:10.3390/ijms24021715), 2023-01-15
Supplement: s1 [file s1]

**Supplementary Table S2:** Tukey's HSD post hoc differences in the content of carotenoids. \*P<0.05; \*\*P<0.01; \*\*\*P<0.001

|                                    | Sample(s)     |               | hsd post hoc |
|------------------------------------|---------------|---------------|--------------|
| Lutein                             | Healthy Leaf  | TSSM-fed leaf | -39.391***   |
|                                    |               | TSSMs         | n.a.         |
|                                    | TSSM-fed leaf | TSSMs         | n.a.         |
| Putative xanthophyll               | Healthy Leaf  | TSSM-fed leaf | 1.752        |
|                                    |               | TSSMs         | -3.509***    |
|                                    | TSSM-fed leaf | TSSMs         | -5.261***    |
| 15- <i>cis</i> - $\beta$ -carotene | Healthy Leaf  | TSSM-fed leaf | 0.714*       |
|                                    |               | TSSMs         | -19.766***   |
|                                    | TSSM-fed leaf | TSSMs         | -20.48***    |
| 13- <i>cis</i> - $\beta$ -carotene | Healthy Leaf  | TSSM-fed leaf | 1.975**      |
|                                    |               | TSSMs         | -39.415***   |
|                                    | TSSM-fed leaf | TSSMs         | -41.39***    |
| <i>trans</i> - $\alpha$ -carotene  | Healthy Leaf  | TSSM-fed leaf | 4.909***     |
|                                    |               | TSSMs         | -4.356***    |
|                                    | TSSM-fed leaf | TSSMs         | -9.265***    |
| <i>cis</i> - $\alpha$ -carotene    | Healthy Leaf  | TSSM-fed leaf | -6.814***    |
|                                    |               | TSSMs         | -8.531***    |
|                                    | TSSM-fed leaf | TSSMs         | -1.717***    |
| <i>trans</i> - $\beta$ -carotene   | Healthy Leaf  | TSSM-fed leaf | -2.214**     |
|                                    |               | TSSMs         | -9.475***    |
|                                    | TSSM-fed leaf | TSSMs         | -10.21***    |
| 9- <i>cis</i> - $\beta$ -carotene  | Healthy Leaf  | TSSM-fed leaf | -21.22**     |
|                                    |               | TSSMs         | n.a.         |
|                                    | TSSM-fed leaf | TSSMs         | n.a.         |
| $\gamma$ -carotene                 | Healthy Leaf  | TSSM-fed leaf | 2.541**      |
|                                    |               | TSSMs         | -4.512***    |
|                                    | TSSM-fed leaf | TSSMs         | -6.311***    |
| TCrC                               | Healthy Leaf  | TSSM-fed leaf | 37.921**     |
|                                    |               | TSSMs         | -640.392***  |
|                                    | TSSM-fed leaf | TSSMs         | -678.313***  |

n.a. "not applicable" due to lack of the compound in the sample; TCrC, total carotenoid content
