# Supplementary material for: Biology of Two-Spotted Spider Mite (Tetranychus urticae): Ultrastructure, Photosynthesis, Guanine Transcriptomics, Carotenoids and Chlorophylls Metabolism, and Decoyinine as a Potential Acaricide
Source: MDPI journal article supplement (doi:10.3390/ijms24021715), 2023-01-15
Supplement: s1 [file s1]

### Supplementary Table S3. Primers list

| Gene ID       | Homolog           | Forward primer (5' to 3') | Reverse primer (5' to 3') | Product size (bp) |
|---------------|-------------------|---------------------------|---------------------------|-------------------|
| tetur05g00900 | <i>PRPS1</i>      | TTGGTGAAAGTGTCCTGGT       | GCTCCAGCCACAGAAAGCAT      | 232               |
| tetur01g13720 | <i>PPAT</i>       | TATGGGACAATCGCTGTGGC      | GAAGTGTCTGCTGGTGGCA       | 150               |
| tetur05g04480 | <i>GART</i>       | TTGGTGACGCTGGAAACTC       | AAAAGGCACCCATTCTCCA       | 172               |
| tetur08g02830 | <i>FGAMS</i>      | TGGGCAAAGGAAAAGAAGCC      | ACCCCTGAAGAACCAGTGTC      | 185               |
| tetur01g13710 | <i>PAICS</i>      | TGGCCTAATGGTGATAAGCGG     | CTTCAGGTGGAGGAGGAGGTA     | 193               |
| tetur02g08320 | <i>ADSL</i>       | AAGGCAGCGCCCATTATTCA      | TCGATACAACGAGCCAACCT      | 119               |
| tetur06g05840 | <i>ATIC</i>       | CTCTGACCAGCGTGACATGA      | GCTCCAGCCCGTAAAAGAGT      | 162               |
| tetur18g02770 | <i>IMPDH1</i>     | CCGAGAGTCCATCATCTGGTT     | TGCCAATAGCAGCTCCAACA      | 201               |
| tetur01g06320 | <i>GMPS</i>       | TGCTCGTTAGTGGTGGTGTC      | GGTCGCTTTCGTCTTTACGC      | 123               |
| tetur21g00550 | <i>PNP</i>        | GCTGGCCATGATGGTGTACT      | TTTCGGGTGCATGTCCTTCA      | 100               |
| tetur01g18640 | <i>Histone H3</i> | TCACCAATCGTTGGAAAGGT      | GGCTGCTCGTAAATCTGCTC      | 146               |
